# Supplementary material for: Development of Surface Enhanced Raman Spectra coupled with Machine Learning Analysis for Differentiation of Closely Related Species within Enterobacter cloacae Complex
Source: Research Square preprint supplement (doi:10.21203/rs.3.rs-7939547/v1), 2025-11-13
Supplement: Supplementary file 1 [file 62cbc5689c0bedf8c28ec4f1.docx]

Supplementary Table S1. Identification results of 92 *Enterobacter cloacae* complexes strains by Vitek 2 Compact, Vitek MS and whole genome sequencing.

| **Number** | **Specimen** | **Year** | **Strain-ANI** | **Vitek 2 Compact** | **Vitek MS** |
| --- | --- | --- | --- | --- | --- |
| 1 | blood | 2015 | E. hormaechei ssp. steigerwaltii | Ent. cloacae complex (98%) | E. cloacae 50.0 E. asburiae 50.0 |
| 2 | blood | 2015 | E. roggenkampii | Ent. cloacae complex (98%) | E. cloacae 50.0 E. asburiae 50.0 |
| 3 | blood | 2015 | E. roggenkampii | Ent. cloacae complex (98%) | E. cloacae 50.0 E. asburiae 50.0 |
| 4 | blood | 2015 | E. hormaechei ssp. steigerwaltii | Ent. cloacae complex (98%) | E. cloacae 50.0 E. asburiae 50.0 |
| 5 | blood | 2015 | Enterobacter hoffmanniic | Ent. cloacae complex (95%) | E. cloacae 50.0 E. asburiae 50.0 |
| 6 | blood | 2015 | E. hormaechei ssp. steigerwaltii | Ent. cloacae complex (96%) | E. cloacae 50.0 E. asburiae 50.0 |
| 7 | blood | 2015 | E. hormaechei ssp. steigerwaltii | Ent. cloacae complex (98%) | E. hormaechei 33.2 E. cloacae 33.3 E. asburiae 33.3 |
| 8 | blood | 2015 | E. hormaechei ssp. steigerwaltii | Ent. cloacae complex (98%) | E. cloacae 50.0 E. asburiae 50.0 |
| 9 | blood | 2015 | E. hormaechei ssp. steigerwaltii | Ent. cloacae complex (98%) | E. cloacae 50.0 E. asburiae 50.0 |
| 10 | blood | 2015 | Enterobacter xiangfangensise | Ent. cloacae complex (98%) | E. cloacae 50.0 E. asburiae 50.0 |
| 11 | blood | 2015 | Enterobacter xiangfangensise | Ent. cloacae complex (96%) | E. cloacae 50.0 E. asburiae 50.0 |
| 12 | blood | 2015 | E. hormaechei ssp. steigerwaltii | Ent. cloacae complex (95%) | E. cloacae 50.0 E. asburiae 50.0 |
| 13 | blood | 2015 | Enterobacter xiangfangensise | Ent. cloacae complex (98%) | E. cloacae 50.0 E. asburiae 50.0 |
| 14 | blood | 2015 | E. bugandensis | Ent. cloacae complex (98%) | E. cloacae 50.0 E. asburiae 50.0 |
| 15 | blood | 2015 | Enterobacter xiangfangensise | Ent. cloacae complex (99%) | E. cloacae 50.0 E. asburiae 50.0 |
| 16 | blood | 2015 | E. bugandensis | Ent. cloacae complex (98%) | E. cloacae 50.0 E. asburiae 50.0 |
| 17 | blood | 2015 | E. hormaechei ssp. steigerwaltii | Ent. cloacae complex (98%) | E. cloacae 50.0 E. asburiae 50.0 |
| 18 | blood | 2015 | E. kobei | Ent. cloacae complex (98%) | E. kobei 34.1 E. cloacae 32.9 E. asburiae 32.9 |
| 19 | blood | 2015 | E. hormaechei ssp. steigerwaltii | Ent. cloacae complex (96%) | E. cloacae 50.0 E. asburiae 50.0 |
| 20 | blood | 2016 | E. hormaechei ssp. steigerwaltii | Ent. cloacae complex (98%) | E. cloacae 50.0 E. asburiae 50.0 |
| 21 | blood | 2016 | Enterobacter hoffmanniic | Ent. cloacae complex (98%) | E. cloacae 50.0 E. asburiae 50.0 |
| 22 | blood | 2016 | Enterobacter hoffmanniic | Ent. cloacae complex (98%) | E. cloacae 50.0 E. asburiae 50.0 |
| 23 | blood | 2016 | E. kobei | Ent. cloacae complex (98%) | E. cloacae 50.0 E. asburiae 50.0 |
| 24 | blood | 2016 | Enterobacter xiangfangensise | Ent. cloacae complex (95%) | E. cloacae 50.0 E. asburiae 50.0 |
| 25 | blood | 2016 | E. hormaechei ssp. steigerwaltii | Ent. cloacae complex (98%) | E. cloacae 50.0 E. asburiae 50.0 |
| 26 | blood | 2016 | E. hormaechei ssp. steigerwaltii | Ent. cloacae complex (98%) | E. cloacae 50.0 E. asburiae 50.0 |
| 27 | blood | 2016 | E. cloacae ssp. cloacae | Ent. cloacae complex (98%) | E. cloacae 50.0 E. asburiae 50.0 |
| 28 | blood | 2016 | E. cloacae ssp. cloacae | Ent. cloacae complex (98%) | E. cloacae 50.0 E. asburiae 50.0 |
| 29 | blood | 2016 | Enterobacter xiangfangensise | Ent. cloacae complex (96%) | E. hormaechei 35.1 E. cloacae 32.4 E. asburiae 32.4 |
| 30 | blood | 2016 | E. hormaechei ssp. steigerwaltii | Ent. cloacae complex (98%) | E. cloacae 50.0 E. asburiae 50.0 |
| 31 | blood | 2016 | Enterobacter xiangfangensise | Ent. cloacae complex (99%) | E. cloacae 50.0 E. asburiae 50.0 |
| 32 | blood | 2016 | E. hormaechei ssp. steigerwaltii | Ent. cloacae complex (95%) | E. cloacae 50.0 E. asburiae 50.0 |
| 33 | blood | 2016 | E. hormaechei ssp. steigerwaltii | Ent. cloacae complex (98%) | E. cloacae 50.0 E. asburiae 50.0 |
| 34 | blood | 2016 | E. kobei | Ent. cloacae complex (98%) | E. kobei 99.9 |
| 35 | blood | 2016 | E. hormaechei ssp. steigerwaltii | Ent. cloacae complex (98%) | E. cloacae 50.0 E. asburiae 50.0 |
| 36 | blood | 2016 | Enterobacter hoffmanniic | Ent. cloacae complex (98%) | E. cloacae 50.0 E. asburiae 50.0 |
| 37 | blood | 2016 | E. roggenkampii | Ent. cloacae complex (98%) | E. cloacae 50.0 E. asburiae 50.0 |
| 38 | blood | 2016 | E. hormaechei ssp. steigerwaltii | Ent. cloacae complex (98%) | E. cloacae 50.0 E. asburiae 50.0 |
| 39 | blood | 2017 | Enterobacter hoffmanniic | Ent. cloacae complex (95%) | E. cloacae 50.0 E. asburiae 50.0 |
| 40 | blood | 2017 | E. roggenkampii | Ent. cloacae complex (98%) | E. cloacae 50.0 E. asburiae 50.0 |
| 41 | blood | 2017 | E. cloacae ssp. cloacae | Ent. cloacae complex (98%) | E. cloacae 50.0 E. asburiae 50.0 |
| 42 | blood | 2017 | E. cloacae ssp. cloacae | Ent. cloacae complex (98%) | E. cloacae 50.0 E. asburiae 50.0 |
| 43 | blood | 2017 | Enterobacter xiangfangensise | Ent. cloacae complex (98%) | E. cloacae 50.0 E. asburiae 50.0 |
| 44 | blood | 2017 | E. kobei | Ent. cloacae complex (98%) | E. kobei 34.9 E. cloacae 32.5 E. asburiae 32.5 |
| 45 | blood | 2017 | E. cloacae ssp. cloacae | Ent. cloacae complex (98%) | E. cloacae 50.0 E. asburiae 50.0 |
| 46 | blood | 2017 | Enterobacter xiangfangensise | Ent. cloacae complex (98%) | E. cloacae 50.0 E. asburiae 50.0 |
| 47 | blood | 2017 | Enterobacter xiangfangensise | Ent. cloacae complex (98%) | E. cloacae 50.0 E. asburiae 50.0 |
| 48 | blood | 2017 | E. hormaechei ssp. steigerwaltii | Ent. cloacae complex (99%) | E. cloacae 50.0 E. asburiae 50.0 |
| 49 | blood | 2017 | E. bugandensis | Ent. cloacae complex (98%) | E. cloacae 50.0 E. asburiae 50.0 |
| 50 | blood | 2018 | E. bugandensis | Ent. cloacae complex (98%) | E. cloacae 50.0 E. asburiae 50.0 |
| 51 | blood | 2017 | E. cloacae ssp. cloacae | Ent. cloacae complex (96%) | E. cloacae 50.0 E. asburiae 50.0 |
| 52 | blood | 2018 | Enterobacter hoffmanniic | Ent. cloacae complex (98%) | E. cloacae 50.0 E. asburiae 50.0 |
| 53 | blood | 2018 | E. roggenkampii | Ent. cloacae complex (96%) | E. cloacae 50.0 E. asburiae 50.0 |
| 54 | blood | 2018 | E. hormaechei ssp. steigerwaltii | Ent. cloacae complex (98%) | E. cloacae 50.0 E. asburiae 50.0 |
| 55 | blood | 2018 | Enterobacter hoffmanniic | Ent. cloacae complex (98%) | E. cloacae 50.0 E. asburiae 50.0 |
| 56 | blood | 2018 | E. bugandensis | Ent. cloacae complex (98%) | E. cloacae 50.0 E. asburiae 50.0 |
| 57 | blood | 2018 | E. hormaechei ssp. steigerwaltii | Ent. cloacae complex (95%) | E. cloacae 50.0 E. asburiae 50.0 |
| 58 | blood | 2018 | E. kobei | Ent. cloacae complex (98%) | E. cloacae 50.0 E. asburiae 50.0 |
| 59 | blood | 2018 | E. bugandensis | Ent. cloacae complex (98%) | E. cloacae 50.0 E. asburiae 50.0 |
| 60 | blood | 2018 | Enterobacter hoffmanniic | Ent. cloacae complex (98%) | E. cloacae 50.0 E. asburiae 50.0 |
| 61 | blood | 2018 | E. hormaechei ssp. steigerwaltii | Ent. cloacae complex (98%) | E. cloacae 50.0 E. asburiae 50.0 |
| 62 | blood | 2018 | Enterobacter xiangfangensise | Ent. cloacae complex (98%) | E. cloacae 50.0 E. asburiae 50.0 |
| 63 | blood | 2018 | E. cloacae ssp. cloacae | Ent. cloacae complex (98%) | E. cloacae 50.0 E. asburiae 50.0 |
| 64 | blood | 2019 | E. kobei | Ent. cloacae complex (98%) | E. cloacae 50.0 E. asburiae 50.0 |
| 65 | blood | 2019 | Enterobacter xiangfangensise | Ent. cloacae complex (98%) | E. cloacae 50.0 E. asburiae 50.0 |
| 66 | blood | 2019 | Enterobacter hoffmanniic | Ent. cloacae complex (96%) | E. cloacae 50.0 E. asburiae 50.0 |
| 67 | blood | 2019 | E. hormaechei ssp. steigerwaltii | Ent. cloacae complex (98%) | E. cloacae 50.0 E. asburiae 50.0 |
| 68 | blood | 2019 | Enterobacter hoffmanniic | Ent. cloacae complex (98%) | E. cloacae 50.0 E. asburiae 50.0 |
| 69 | blood | 2019 | E. bugandensis | Ent. cloacae complex (98%) | E. cloacae 50.0 E. asburiae 50.0 |
| 70 | blood | 2019 | E. hormaechei ssp. steigerwaltii | Ent. cloacae complex (99%) | E. cloacae 50.0 E. asburiae 50.0 |
| 71 | blood | 2019 | Enterobacter xiangfangensise | Ent. cloacae complex (98%) | E. cloacae 50.0 E. asburiae 50.0 |
| 72 | blood | 2019 | E. bugandensis | Ent. cloacae complex (98%) | E. cloacae 50.0 E. asburiae 50.0 |
| 73 | blood | 2019 | E. cloacae ssp. cloacae | Ent. cloacae complex (98%) | E. cloacae 50.0 E. asburiae 50.0 |
| 74 | blood | 2019 | E. bugandensis | Ent. cloacae complex (98%) | E. cloacae 50.0 E. asburiae 50.0 |
| 75 | blood | 2019 | E. cloacae ssp. cloacae | Ent. cloacae complex (95%) | E. cloacae 50.0 E. asburiae 50.0 |
| 76 | blood | 2020 | Enterobacter xiangfangensise | Ent. cloacae complex (98%) | E. cloacae 50.0 E. asburiae 50.0 |
| 77 | blood | 2020 | E. roggenkampii | Ent. cloacae complex (98%) | E. cloacae 50.0 E. asburiae 50.0 |
| 78 | blood | 2020 | Enterobacter xiangfangensise | Ent. cloacae complex (98%) | E. cloacae 50.0 E. asburiae 50.0 |
| 79 | blood | 2020 | E. hormaechei ssp. steigerwaltii | Ent. cloacae complex (98%) | E. cloacae 50.0 E. asburiae 50.0 |
| 80 | blood | 2020 | Enterobacter xiangfangensise | Ent. cloacae complex (98%) | E. cloacae 50.0 E. asburiae 50.0 |
| 81 | blood | 2020 | E. bugandensis | Ent. cloacae complex (98%) | E. cloacae 50.0 E. asburiae 50.0 |
| 82 | blood | 2020 | E. hormaechei ssp. steigerwaltii | Ent. cloacae complex (96%) | E. cloacae 50.0 E. asburiae 50.0 |
| 83 | blood | 2020 | E. hormaechei ssp. steigerwaltii | Ent. cloacae complex (98%) | E. cloacae 50.0 E. asburiae 50.0 |
| 84 | blood | 2020 | E. cloacae ssp. cloacae | Ent. cloacae complex (95%) | E. cloacae 50.0 E. asburiae 50.0 |
| 85 | blood | 2020 | E. hormaechei ssp. steigerwaltii | Ent. cloacae complex (99%) | E. cloacae 50.0 E. asburiae 50.0 |
| 86 | blood | 2020 | E. cloacae ssp. cloacae | Ent. cloacae complex (98%) | E. cloacae 50.0 E. asburiae 50.0 |
| 87 | blood | 2020 | E. cloacae ssp. cloacae | Ent. cloacae complex (98%) | E. cloacae 50.0 E. asburiae 50.0 |
| 88 | blood | 2020 | Enterobacter hoffmanniic | Ent. cloacae complex (98%) | E. cloacae 50.0 E. asburiae 50.0 |
| 89 | blood | 2020 | E. kobei | Ent. cloacae complex (98%) | E. cloacae 50.0 E. asburiae 50.0 |
| 90 | blood | 2020 | Enterobacter xiangfangensise | Ent. cloacae complex (98%) | E. cloacae 50.0 E. asburiae 50.0 |
| 91 | blood | 2020 | E. bugandensis | Ent. cloacae complex (98%) | E. cloacae 50.0 E. asburiae 50.0 |
| 92 | blood | 2020 | E. hormaechei ssp. steigerwaltii | Ent. cloacae complex (99%) | E. cloacae 50.0 E. asburiae 50.0 |

Supplementary Table S2. The Best Combination of hyperparameter for Different Machine Learning Algorithms.

| **Algorithms** | **Function** | **Parameter Range** | **Optimum Parameter** |
| --- | --- | --- | --- |
| **XGBoost** | XGBClassifier | **n_estimators =** [50, 60, 70, 80, 90, 100, 110, 120, 130, 140, 150, 160, 170, 180],  **learning_ rate =** [0.1, 1, 0.01, 0.001, 0.0001] | **estimators** = 150, **learning_rate** = 0.1 |
| **GBoost** | Gradient BoostingClassifier | **n_estimators =** [120, 130, 140, 145, 150, 160, 170, 175, 180, 185],  **learning_ rate =** [0.1, 1, 0.01, 0.001] | **estimators** = 170, **learning_rate** = 1 |
| **Random Forest** | RandomForestClassifier | **Criterion** = ['gini', 'entropy'],  **max_depth** = range (1, 9),  **n_estimators** = [120, 130, 140, 145, 150, 155, 160, 170, 180] | **criterion** = 'entropy', **max_depth** = 9, **n_estimators** = 150 |
| **SVM** | SVC | **Cs =** [0.0001, 0.001, 0.01, 0.1, 1],  **gamma =** [0.0001, 0.001, 0.01, 0.1, 1] | **Cs =** 1,  **gamma =** 0.0001 |
| **Decision Tree** | DecisionTreeClassifier | **criterion** = ['gini', 'entropy'],  **max_depth** = range (1, 29), **max_features** = [1, 2, 3, 4, 5, 6, 7, 8, 9, 10, 11, 12, 13, 14, 15, 16, 17, 18, 19, 20, 21, 22, 23, 24, 25, 26, 28, 29, 'auto'] | **criterion** = 'entropy',  **max_depth** = 29,  **max_features** = 23 |
| **AdaBoost** | AdaBoostClassifier | **learning_rate** = [0.1, 1, 0.01, 0.001,0.0001],  **n_estimators** = [50, 60, 70, 80, 90, 100, 110, 120, 130, 140, 150, 160, 170, 180] | **learning_rate** =1, **n_estimators** = 180 |
